# Supplementary material for: Prognostic factors in Spanish COVID-19 patients: A case series from Barcelona
Source: PLoS One. 2020 Aug 21;15(8):e0237960. doi: 10.1371/journal.pone.0237960 (PMC7444503; doi:10.1371/journal.pone.0237960)
Supplement: S1 Dataset — (XLSX) [file pone.0237960.s001.xlsx]

## Sheet: Dataset
ID	clin_Age	clin_Sex	clin_Occupation	clin_Ever smoked	clin_Temperature	clin_Time from symptom onset to medical visit	symp_Cough	symp_General malaise	symp_Fatigue	symp_Myalgia or arthralgia	symp_Dyspnoea	symp_Diarrhoea	symp_Headache	symp_Anosmia	symp_Dysgeusia	symp_Sore throat	symp_Blocked nose	symp_Nausea or vomiting	symp_Sputum production	symp_Chills	symp_Asthenia	symp_Chest pain	symp_Disorientation	symp_Conjuntivitis	symp_Hemoptysis	symp_Cutaneous lesions	exam_Auscultatory alterations	exam_Tachypnoea	exam_Tachycardia	exam_Pharyngitis	exam_Cutaneous lesions	exam_Tonsillopharyngitis	exam_Oxygen saturation	comor_Any comorbidity	comor_Hypertension	comor_Diabetes	comor_Obesity	comor_Dyslipidemia	comor_Cancer	comor_Chronic kidney disease	comor_Heart disease	comor_Autoimmune disease	comor_Chronic obstructive pulmonary disease	comor_Depression	comor_Cardiac arrhythmia	comor_Thyroid alterations	comor_Asthma	comor_Liver disease	comor_Cerebrovascular disease
1	27	Male	Health professional	No	37.7	1	1	1	1	1	0	0	0	0	0	1	1	1	0	0	0	0	0	0	0	0	NA	NA	NA	NA	NA	NA	NA	0	0	0	0	0	0	0	0	0	0	0	0	0	0	0	0
2	70	Female	Other type of exposure	No	37.8	5	1	1	1	0	1	0	1	0	0	0	0	1	0	0	0	0	0	0	0	0	0	1	1	0	0	0	85	1	1	1	1	0	0	1	1	0	0	0	0	0	0	0	0
3	29	Male	Health professional	NA	37.7	1	1	1	1	1	0	0	0	0	0	1	0	0	0	0	0	0	0	0	0	0	NA	NA	NA	NA	NA	NA	NA	1	0	1	0	0	0	0	0	0	0	0	0	0	0	0	0
4	49	Female	Other type of exposure	Yes	38.5	8	1	1	0	0	1	1	0	0	0	0	0	0	1	0	0	0	0	0	0	0	0	1	0	0	0	0	97	0	0	0	0	0	0	0	0	0	0	0	0	0	0	0	0
5	47	Male	Other health workers	No	37.5	2	1	1	1	0	1	1	0	0	0	0	0	0	0	0	0	0	0	0	0	0	0	0	1	0	0	0	97	1	0	0	1	0	0	0	0	0	0	0	0	0	0	0	0
6	37	Male	Health professional	NA	37.5	2	1	1	0	0	0	0	0	1	1	0	1	0	0	0	0	0	0	0	0	0	NA	NA	NA	NA	NA	NA	99	0	0	0	0	0	0	0	0	0	0	0	0	0	0	0	0
7	77	Male	Other type of exposure	Yes	38.5	2	0	0	1	0	0	1	0	0	0	0	1	0	0	0	0	0	0	0	0	0	0	0	0	0	0	0	98	1	1	1	1	0	1	1	1	0	0	0	0	0	0	0	0
8	48	Male	Other type of exposure	No	38.5	2	1	1	0	0	0	0	0	0	0	1	0	0	0	0	0	1	0	0	0	0	1	0	0	0	0	0	98	1	1	0	0	0	0	0	0	0	0	0	0	0	0	0	0
9	47	Male	Other type of exposure	No	37.7	9	1	0	0	0	0	0	0	0	0	1	0	0	0	0	0	0	0	0	0	0	1	1	0	0	0	0	96	0	0	0	0	0	0	0	0	0	0	0	0	0	0	0	0
10	66	Female	Other type of exposure	No	37.7	4	0	0	0	0	0	1	0	0	0	0	0	1	0	0	1	0	0	0	0	0	0	0	0	0	0	0	99	1	0	0	0	0	0	0	1	0	0	0	0	0	0	0	0
11	85	Male	Other type of exposure	No	38.5	1	1	1	0	1	0	0	0	0	0	1	1	0	0	0	0	0	0	0	0	0	0	1	1	0	0	0	94	1	1	1	1	0	0	0	1	0	1	0	0	0	0	0	0
12	90	Female	Other type of exposure	No	37.6	3	1	0	0	0	0	1	0	0	0	0	0	0	0	0	1	0	0	0	0	0	1	0	0	0	0	0	NA	1	1	0	0	0	1	1	1	0	0	0	0	0	0	0	0
13	78	Male	Other type of exposure	Yes	37.5	0	1	0	0	0	0	0	0	0	0	1	0	0	0	0	0	0	0	0	0	0	1	1	0	0	0	0	88	1	1	0	1	1	0	1	0	1	1	0	0	0	0	0	0
14	66	Female	Other type of exposure	Yes	37	1	1	0	0	0	0	0	0	0	0	1	0	0	1	0	0	0	0	0	0	0	1	0	0	0	0	0	99	1	1	0	0	1	0	0	0	0	0	0	0	0	0	0	0
15	42	Female	Health professional	No	36.5	1	1	1	0	0	0	0	0	0	0	0	1	0	0	0	0	0	0	0	0	0	NA	NA	NA	NA	NA	NA	NA	0	0	0	0	0	0	0	0	0	0	0	0	0	0	0	0
16	34	Female	Health professional	Yes	36.5	6	1	0	0	0	0	0	0	0	0	0	0	0	0	0	0	0	0	0	0	0	0	0	0	0	0	0	NA	1	0	0	0	0	0	0	0	0	0	0	0	0	1	0	0
17	68	Male	Other type of exposure	Yes	37.3	2	1	0	0	1	0	0	0	0	0	0	0	0	0	0	0	0	0	0	0	0	1	1	0	0	0	0	81	1	1	1	1	1	0	0	0	0	0	0	0	0	0	0	0
18	50	Male	Health professional	No	38	0	1	0	0	1	0	0	0	0	0	0	0	0	0	0	0	0	0	0	0	0	NA	NA	NA	NA	NA	NA	NA	0	0	0	0	0	0	0	0	0	0	0	0	0	0	0	0
19	33	Male	Health professional	NA	38	2	1	0	0	1	0	0	0	0	0	0	0	0	1	0	0	0	0	0	0	0	NA	NA	NA	NA	NA	NA	NA	0	0	0	0	0	0	0	0	0	0	0	0	0	0	0	0
20	44	Male	Other type of exposure	NA	38	3	1	0	1	0	0	0	1	0	0	0	0	0	0	0	0	0	0	0	0	0	1	0	1	0	0	0	92	1	0	0	0	0	0	0	0	1	0	0	0	0	0	0	0
21	69	Male	Health professional	No	37	12	0	1	0	0	1	1	0	0	0	0	0	1	0	0	0	0	0	0	0	0	1	1	0	0	0	0	94	1	1	0	0	1	0	0	0	0	0	0	1	0	0	0	1
22	51	Male	Health professional	NA	NA	NA	1	0	0	0	1	0	0	0	0	0	0	0	0	0	0	0	0	0	0	0	NA	NA	NA	NA	NA	NA	NA	1	0	0	0	0	0	0	0	0	0	0	0	0	1	0	0
23	52	Male	Health professional	NA	NA	NA	0	0	0	0	0	0	0	0	0	0	0	0	0	0	0	0	0	0	0	0	NA	NA	NA	NA	NA	NA	NA	0	0	0	0	0	0	0	0	0	0	0	0	0	0	0	0
24	61	Female	Other type of exposure	Yes	38.3	1	1	1	0	0	1	0	0	0	0	0	0	1	0	0	0	0	0	0	0	0	1	0	0	0	0	0	96	1	0	0	1	1	0	0	0	0	0	0	1	1	0	0	0
25	48	Female	Other type of exposure	Yes	38	6	1	1	0	0	1	0	1	0	0	1	0	0	1	0	0	0	0	0	0	0	0	0	0	1	0	0	100	0	0	0	0	0	0	0	0	0	0	0	0	0	0	0	0
26	32	Male	Health professional	NA	36.5	7	1	0	0	0	0	0	0	1	1	1	0	0	0	0	0	0	0	0	0	0	NA	NA	NA	NA	NA	NA	NA	0	0	0	0	0	0	0	0	0	0	0	0	0	0	0	0
27	48	Male	Other type of exposure	NA	37	2	1	1	0	0	0	0	0	0	0	0	0	0	0	0	0	0	0	0	0	0	0	0	0	0	0	0	94	1	0	1	0	1	0	0	0	0	0	0	0	0	0	0	0
28	37	Male	Other type of exposure	No	38	3	1	1	0	0	0	0	1	1	0	0	0	0	0	0	0	0	0	0	0	0	0	0	0	0	0	0	96	1	0	0	0	0	0	0	0	0	0	0	0	0	0	1	0
29	29	Female	Health professional	NA	37	2	0	0	1	1	0	0	0	0	0	0	0	0	0	0	0	0	0	0	0	0	NA	NA	NA	NA	NA	NA	NA	0	0	0	0	0	0	0	0	0	0	0	0	0	0	0	0
30	57	Male	Health professional	Yes	37	2	1	1	0	0	0	0	1	0	0	0	0	0	0	0	0	0	0	0	0	0	NA	NA	NA	NA	NA	NA	NA	0	0	0	0	0	0	0	0	0	0	0	0	0	0	0	0
31	52	Female	Health professional	No	36.5	NA	1	0	0	1	0	0	0	0	0	0	0	0	0	0	0	0	0	0	0	0	NA	NA	NA	NA	NA	NA	NA	1	1	0	0	0	0	0	0	0	0	0	0	0	0	0	0
32	46	Male	Health professional	NA	36	0	0	0	0	0	0	0	0	0	0	0	0	0	0	0	0	0	0	0	0	0	NA	NA	NA	NA	NA	NA	NA	0	0	0	0	0	0	0	0	0	0	0	0	0	0	0	0
33	44	Male	Other type of exposure	No	37	2	1	0	0	0	1	0	0	0	0	0	0	0	0	0	0	0	0	0	0	0	1	0	0	0	0	0	97	1	0	0	0	0	0	0	0	0	0	0	0	0	1	0	0
34	86	Female	Other type of exposure	No	36.5	11	1	0	0	0	0	0	0	0	0	0	0	0	0	0	0	0	0	0	0	0	1	1	0	0	0	0	84	1	1	1	0	1	0	1	0	0	0	1	0	0	0	0	0
35	76	Female	Other type of exposure	Yes	36	NA	1	1	1	0	0	0	0	0	0	0	0	0	0	0	0	0	0	0	0	0	1	0	0	0	0	0	NA	1	0	0	0	0	1	0	0	0	0	0	0	0	0	0	0
36	74	Male	Other type of exposure	No	38	1	1	0	0	0	0	1	0	0	0	0	0	0	0	0	0	0	0	0	0	0	0	1	0	0	0	0	93	1	1	0	1	0	0	0	1	0	0	0	0	0	0	0	0
37	58	Male	Other type of exposure	NA	38	2	0	0	0	0	0	0	0	0	0	0	0	0	0	0	0	0	0	0	0	0	NA	NA	NA	NA	NA	NA	NA	1	0	0	1	0	0	0	0	0	0	0	0	0	0	0	0
38	41	Female	Health professional	Yes	36	5	1	0	0	0	0	0	0	1	1	0	0	0	1	0	0	0	0	0	0	0	NA	NA	NA	NA	NA	NA	NA	0	0	0	0	0	0	0	0	0	0	0	0	0	0	0	0
39	80	Male	Other type of exposure	No	38.5	6	1	1	0	1	0	0	1	0	0	0	0	0	1	0	0	0	0	0	0	0	1	0	0	1	0	0	100	1	1	1	0	1	1	0	0	0	0	0	0	0	0	0	0
40	74	Female	Other type of exposure	No	38.5	1	1	1	1	1	0	1	1	0	0	0	0	0	0	0	0	0	0	0	0	0	1	0	0	0	0	0	98	1	0	0	1	0	0	0	0	0	0	0	0	0	0	0	0
41	70	Male	Other type of exposure	Yes	37.7	1	1	0	1	0	0	0	0	0	0	0	0	0	0	0	0	0	0	0	0	0	1	0	0	0	0	0	92	1	1	0	1	0	0	0	1	0	1	0	0	0	0	1	0
42	36	Female	Health professional	No	37.2	1	1	0	0	0	0	1	1	1	0	0	1	0	0	0	0	1	0	0	0	0	0	0	0	1	0	0	98	1	0	0	0	0	0	0	0	0	0	0	0	0	0	0	0
43	59	Female	Health professional	Yes	37	13	0	0	0	0	0	0	0	1	1	0	0	0	0	0	0	0	0	0	0	0	NA	NA	NA	NA	NA	NA	NA	1	1	0	0	0	0	0	0	0	0	0	0	0	0	0	0
44	71	Male	Other type of exposure	No	39.5	10	1	0	1	1	1	0	0	0	0	0	0	0	0	0	0	0	0	0	0	0	1	0	0	0	0	0	90	1	1	0	0	0	0	0	0	0	0	0	0	0	0	0	0
45	93	Female	Other type of exposure	No	38	NA	1	1	1	0	0	0	0	0	0	0	0	0	0	0	0	0	0	0	0	0	0	0	0	0	0	0	NA	1	1	0	0	0	0	0	0	0	0	0	0	0	0	0	0
46	43	Female	Other type of exposure	No	37.8	4	1	0	1	0	0	0	0	0	1	1	0	0	0	0	0	0	0	0	0	0	1	0	0	0	0	0	94	1	0	0	0	1	0	0	0	1	0	0	0	0	0	0	0
47	84	Male	Other type of exposure	Yes	38	5	0	1	0	0	0	0	0	0	0	0	0	0	0	0	1	0	0	0	0	0	1	0	0	0	0	0	96	1	1	1	1	0	0	1	0	0	0	0	0	0	0	0	0
48	90	Male	Other type of exposure	No	36.1	0	1	1	0	0	0	0	0	0	0	0	0	0	0	0	0	0	0	0	0	0	1	0	0	0	0	0	86	1	1	0	1	0	0	1	1	0	0	0	1	0	0	0	0
49	15	Female	Other type of exposure	No	37.7	11	1	1	1	0	0	0	0	1	1	0	0	0	0	0	0	1	0	0	0	0	1	0	1	0	0	0	NA	1	0	0	0	0	0	0	0	0	0	0	0	0	1	0	0
50	38	Female	Health professional	No	36.5	3	1	1	0	1	0	0	0	0	0	0	0	0	0	0	0	0	0	0	0	0	NA	NA	NA	NA	NA	NA	NA	1	0	0	0	0	0	0	0	0	0	0	0	0	1	0	0
51	29	Male	Health professional	No	38	NA	1	0	0	1	0	0	1	1	1	0	0	0	0	0	0	0	0	0	0	0	0	0	0	0	0	0	99	0	0	0	0	0	0	0	0	0	0	0	0	0	0	0	0
52	30	Female	Health professional	No	37.5	1	1	0	0	0	0	0	0	0	0	0	1	0	0	0	0	0	0	0	0	0	NA	NA	NA	NA	NA	NA	NA	0	0	0	0	0	0	0	0	0	0	0	0	0	0	0	0
53	28	Female	Other type of exposure	No	37	3	1	0	0	1	0	0	0	0	0	0	0	0	0	0	0	0	0	0	0	0	1	0	0	0	0	0	99	1	0	0	0	0	0	0	0	0	0	0	0	0	1	0	0
54	28	Male	Health professional	No	37.2	1	1	1	1	0	0	0	0	0	0	0	0	0	0	0	0	0	0	0	0	0	NA	NA	NA	NA	NA	NA	NA	1	0	0	0	0	0	0	0	0	0	0	0	0	1	0	0
55	41	Female	Other type of exposure	No	38	0	1	1	0	0	0	1	0	0	0	0	1	0	0	1	0	0	0	0	0	0	0	0	0	0	0	0	94	0	0	0	0	0	0	0	0	0	0	0	0	0	0	0	0
56	43	Female	Health professional	No	38	3	0	0	0	0	0	0	1	1	1	0	0	0	0	0	0	0	0	0	0	0	NA	NA	NA	NA	NA	NA	NA	1	0	0	0	0	0	0	0	0	0	0	0	1	0	0	0
57	55	Male	Other type of exposure	No	38.3	1	1	1	0	1	0	0	1	0	0	0	0	0	0	0	0	0	0	0	0	0	NA	NA	NA	NA	NA	NA	97	0	0	0	0	0	0	0	0	0	0	0	0	0	0	0	0
58	45	Female	Other health workers	No	39	2	1	0	1	0	0	0	0	1	1	0	1	0	0	0	0	0	0	0	0	0	1	0	1	0	0	0	99	0	0	0	1	0	0	0	0	0	0	0	0	0	0	0	0
59	71	Male	Other type of exposure	Yes	38	5	0	1	1	0	1	1	0	0	0	0	0	0	0	0	0	0	0	0	0	0	1	0	0	0	0	0	85	1	1	1	1	0	0	0	0	0	0	0	0	0	0	0	0
60	28	Female	Health professional	No	NA	0	0	0	0	0	0	0	1	1	0	0	0	0	0	0	0	0	0	0	0	0	NA	NA	NA	NA	NA	NA	NA	0	0	0	0	0	0	0	0	0	0	0	0	0	0	0	0
61	57	Female	Health professional	NA	38.5	7	1	0	0	0	1	0	0	0	1	0	0	0	0	0	0	1	0	0	0	0	1	0	0	0	0	0	96	0	0	0	0	0	0	0	0	0	0	0	0	0	0	0	0
62	90	Male	Other type of exposure	No	39	0	1	1	1	0	0	0	0	0	0	0	0	0	1	1	0	0	1	0	0	0	0	0	0	0	0	0	84	1	0	0	0	0	0	0	0	1	0	0	1	0	0	0	1
63	24	Female	Health professional	No	38.6	1	1	0	1	1	1	0	0	1	1	1	0	0	0	0	0	0	0	0	0	0	NA	NA	NA	NA	NA	NA	NA	0	0	0	0	0	0	0	0	0	0	0	0	0	0	0	0
64	60	Male	Other type of exposure	NA	37	6	1	1	1	0	1	0	1	0	0	0	0	0	0	0	0	0	0	0	0	0	1	0	0	0	0	0	94	1	0	0	0	0	0	0	0	0	0	0	0	0	0	1	0
65	49	Male	Other health workers	NA	NA	0	0	1	1	0	0	0	0	1	1	0	0	0	0	0	0	0	0	0	0	0	NA	NA	NA	NA	NA	NA	NA	0	0	0	0	0	0	0	0	0	0	0	0	0	0	0	0
66	36	Female	Health professional	No	NA	3	1	0	1	0	0	0	0	0	0	0	0	0	0	0	0	0	0	0	0	0	NA	NA	NA	NA	NA	NA	NA	1	0	0	0	0	0	0	0	0	0	0	0	0	0	0	0
67	61	Female	Other type of exposure	NA	39	3	1	1	0	1	0	0	1	0	0	0	0	1	0	1	1	0	0	0	0	0	1	0	0	0	0	0	97	1	1	0	0	0	0	0	0	0	0	0	0	0	0	0	0
68	63	Female	Other type of exposure	NA	38.8	12	1	1	0	0	0	1	0	1	1	0	1	1	0	0	0	0	0	0	0	0	1	0	0	0	0	0	96	1	0	0	0	0	0	0	0	0	0	1	0	0	0	0	0
69	68	Male	Other type of exposure	No	37.5	7	0	1	1	0	0	0	0	0	0	0	0	0	0	1	0	0	0	0	0	0	1	0	0	0	0	0	96	1	1	0	0	0	0	0	0	0	0	0	0	0	0	0	0
70	61	Male	Other type of exposure	No	38.5	3	1	1	0	0	0	1	0	0	0	0	0	0	0	1	0	0	0	0	0	0	1	0	0	0	0	0	98	0	0	0	0	0	0	0	0	0	0	0	0	0	0	0	0
71	54	Male	Other type of exposure	Yes	38.5	5	1	1	0	0	0	0	0	0	1	0	0	0	0	0	0	0	0	0	0	0	1	0	1	0	0	0	NA	0	0	0	0	0	0	0	0	0	0	0	0	0	0	0	0
72	61	Female	Health professional	No	NA	0	1	1	0	0	0	0	0	0	0	0	0	0	0	0	0	0	0	0	0	0	0	0	0	0	0	0	98	1	1	0	0	0	0	0	0	0	0	0	0	0	0	0	0
73	48	Male	Health professional	NA	NA	0	0	1	0	0	0	0	0	1	0	0	0	0	0	0	0	0	0	0	0	0	1	0	0	0	0	0	98	1	1	0	0	0	0	0	0	0	0	0	0	0	0	0	0
74	76	Female	Other type of exposure	No	NA	0	0	0	0	0	1	0	1	0	0	0	0	1	0	0	0	0	0	0	0	0	NA	NA	NA	NA	NA	NA	NA	1	1	0	0	0	0	0	0	1	0	0	0	0	0	0	0
75	61	Male	Other type of exposure	No	37.7	1	1	0	0	0	0	0	0	0	0	0	0	1	0	0	0	0	0	0	0	0	1	0	0	0	0	0	96	1	1	1	0	0	0	0	1	0	0	0	0	0	0	0	0
76	70	Male	Other type of exposure	Yes	38	7	1	0	0	0	1	0	0	0	0	0	0	0	0	0	0	0	0	0	0	0	1	1	0	0	0	0	78	1	1	1	1	0	0	0	0	0	1	0	0	0	0	0	0
77	50	Male	Other type of exposure	NA	37.3	9	1	0	1	0	1	0	1	0	0	0	0	0	0	0	0	0	0	0	0	0	1	0	0	0	0	0	98	1	0	0	1	0	0	0	0	0	0	0	0	0	1	0	0
78	71	Male	Other type of exposure	Yes	38.9	3	1	1	0	1	1	0	0	1	1	0	0	0	1	0	0	0	0	0	0	0	1	1	1	0	0	0	96	1	0	0	0	0	1	1	0	0	0	0	0	0	0	0	0
79	52	Female	Health professional	NA	NA	0	1	0	0	0	0	0	0	0	0	0	0	0	0	0	0	0	0	0	0	0	NA	NA	NA	NA	NA	NA	NA	0	0	0	0	0	0	0	0	0	0	0	0	0	0	0	0
80	66	Female	Other type of exposure	NA	38.5	5	1	0	0	1	1	0	0	0	0	1	0	0	1	0	0	0	0	0	0	0	1	1	0	0	0	1	97	1	1	1	0	1	0	0	0	0	0	0	0	0	0	0	0
81	63	Male	Other type of exposure	Yes	38	0	1	0	0	0	0	0	0	0	0	0	0	0	0	0	0	1	0	0	0	0	1	0	0	0	0	0	96	1	1	0	1	1	1	0	1	0	0	0	0	0	0	0	0
82	71	Female	Other type of exposure	No	NA	0	0	0	0	0	0	0	0	0	0	0	0	0	0	0	0	0	0	0	0	0	NA	NA	NA	NA	NA	NA	NA	1	1	1	0	0	0	0	0	1	0	0	0	0	0	0	1
83	64	Female	Other health workers	No	36.5	14	1	1	0	0	0	1	1	0	0	0	0	0	0	0	0	0	0	0	0	0	1	0	0	0	0	0	97	1	0	0	0	1	1	0	0	0	0	0	0	0	0	0	0
84	36	Female	Health professional	No	36.5	4	1	1	0	0	0	0	1	0	0	0	0	0	0	0	0	0	0	0	0	0	NA	NA	NA	NA	NA	NA	NA	0	0	0	0	0	0	0	0	0	0	0	0	0	0	0	0
85	35	Female	Health professional	NA	37.5	4	0	0	1	1	0	0	1	0	0	0	0	0	0	0	0	0	0	0	0	1	0	0	0	0	1	0	100	0	0	0	0	0	0	0	0	0	0	0	0	0	0	0	0
86	27	Female	Health professional	Yes	37.3	0	0	0	0	1	0	0	1	1	0	0	1	0	1	0	0	0	0	0	0	0	NA	NA	NA	NA	NA	NA	NA	0	0	0	0	0	0	0	0	0	0	0	0	0	0	0	0
87	57	Female	Health professional	No	38	0	1	0	0	1	0	0	1	0	0	0	0	0	0	0	0	0	0	0	0	0	0	0	0	0	0	0	97	1	0	0	0	0	0	0	0	0	0	0	0	1	0	0	0
88	42	Male	Other type of exposure	No	NA	0	0	0	0	0	0	0	0	0	0	0	0	0	0	0	0	0	0	0	0	0	NA	NA	NA	NA	NA	NA	NA	1	0	0	0	0	0	0	0	0	0	1	0	0	0	0	0
89	60	Female	Health professional	NA	38	7	1	1	0	1	1	0	0	0	0	0	0	0	0	0	0	0	0	0	0	0	1	0	0	0	0	0	95	0	0	0	0	0	0	0	0	0	0	0	0	0	0	0	0
90	26	Female	Other type of exposure	No	37.2	14	1	1	0	1	1	0	0	0	0	0	0	0	0	0	0	0	0	0	0	0	0	0	0	0	0	0	99	0	0	0	0	0	0	0	0	0	0	0	0	0	0	0	0
91	58	Male	Other type of exposure	Yes	39	0	1	1	0	0	1	0	0	0	0	0	0	0	0	0	0	0	0	0	0	0	1	1	0	0	0	0	93	1	1	0	0	0	0	0	0	0	0	0	0	0	0	0	0
92	66	Male	Health professional	Yes	38.2	6	1	0	0	1	1	1	0	1	0	1	0	0	0	0	0	0	0	0	0	0	1	0	1	0	0	0	96	1	1	0	1	0	0	0	0	0	0	0	0	0	0	0	0
93	65	Male	Other type of exposure	NA	38.2	2	1	1	0	1	0	1	0	0	1	0	0	0	0	0	0	0	0	0	0	0	1	0	0	0	0	0	98	1	1	0	0	0	0	1	0	0	0	0	0	0	0	0	0
94	90	Female	Other type of exposure	No	38	5	1	1	1	1	1	0	1	0	0	0	0	0	1	0	0	0	0	0	0	0	NA	NA	NA	NA	NA	NA	NA	1	1	0	0	0	1	0	0	0	0	0	0	0	0	0	1
95	51	Female	Other type of exposure	NA	38.2	0	0	1	1	0	1	0	0	0	0	0	0	0	0	0	0	0	0	0	0	0	1	1	0	0	0	0	93	0	0	0	0	0	0	0	0	0	0	0	0	0	0	0	0
96	60	Female	Health professional	NA	NA	0	0	0	0	0	0	0	0	0	0	0	0	0	0	0	0	0	0	0	0	0	NA	NA	NA	NA	NA	NA	NA	0	0	0	0	0	0	0	0	0	0	0	0	0	0	0	0
97	27	Female	Health professional	No	37	7	1	0	0	1	1	1	0	1	1	0	0	0	0	1	0	0	0	0	0	0	0	0	0	0	0	0	NA	0	0	0	0	0	0	0	0	0	0	0	0	0	0	0	0
98	70	Female	Other type of exposure	No	37.8	7	0	1	0	0	0	0	1	1	0	0	0	0	0	0	0	0	0	0	0	0	1	1	0	0	0	0	92	1	1	0	0	1	0	1	0	0	0	0	0	0	0	0	0
99	53	Female	Other health workers	NA	37.8	2	1	0	0	0	0	0	0	1	1	0	0	0	0	0	0	0	0	0	0	0	NA	NA	NA	NA	NA	NA	NA	0	0	0	0	0	0	0	0	0	0	0	0	0	0	0	0
100	70	Female	Other type of exposure	No	37.7	6	1	1	0	1	0	1	1	0	0	0	0	1	0	0	0	0	0	0	0	0	0	1	1	0	0	0	95	1	1	1	0	0	0	0	0	0	0	0	0	0	0	0	0
101	31	Female	Health professional	No	37	2	1	0	0	1	0	0	0	0	0	0	0	0	0	0	0	0	0	0	0	0	NA	NA	NA	NA	NA	NA	NA	1	0	0	0	0	0	0	0	0	0	0	1	0	0	0	0
102	73	Male	Other type of exposure	Yes	38	10	1	1	1	0	0	0	0	0	0	0	0	0	0	0	0	0	0	0	0	0	1	1	0	0	0	0	92	1	0	1	1	0	0	0	0	0	0	0	0	0	0	1	0
103	72	Male	Other type of exposure	Yes	37.4	0	1	0	0	0	1	0	0	0	0	0	0	0	1	0	0	0	0	0	0	0	1	1	0	0	0	0	92	1	1	0	0	0	0	1	1	0	0	0	0	0	0	0	0
104	64	Female	Other type of exposure	NA	38.5	0	1	0	0	0	1	0	0	0	0	0	1	0	0	0	0	0	0	0	0	0	1	0	0	0	0	0	95	1	1	1	0	0	0	0	0	0	0	0	0	0	0	0	0
105	90	Male	Other type of exposure	No	37.5	3	0	0	1	0	0	0	0	0	1	0	1	0	0	0	0	0	0	0	0	0	1	0	0	0	0	0	93	1	1	0	0	1	0	0	1	0	0	0	0	0	0	0	0
106	53	Male	Health professional	NA	37.4	0	1	0	0	0	0	0	0	0	0	0	0	0	0	0	0	0	0	0	0	0	1	0	1	0	0	0	96	0	0	0	0	0	0	0	0	0	0	0	0	0	0	0	0
107	88	Male	Other type of exposure	No	37.8	10	1	0	0	0	0	0	0	0	0	0	0	0	0	0	0	0	0	0	0	0	1	0	0	0	0	0	97	1	0	1	0	0	0	0	0	0	0	0	0	0	0	0	0
108	58	Male	Other type of exposure	Yes	38	7	0	0	0	0	0	1	0	0	0	0	1	1	0	1	0	0	0	0	0	0	0	1	0	0	0	0	97	1	1	0	0	0	1	1	1	0	0	0	0	0	0	0	0
109	80	Male	Other type of exposure	No	39.2	2	1	1	0	0	0	1	0	0	0	0	0	0	0	0	1	0	1	0	0	0	1	0	0	0	0	0	95	1	0	0	0	0	1	0	0	0	0	0	0	1	0	0	0
110	53	Female	Health professional	No	37	1	1	0	0	0	0	1	0	0	0	0	1	0	0	0	0	0	0	0	0	0	NA	NA	NA	NA	NA	NA	NA	1	0	0	0	0	0	0	0	0	0	0	0	0	0	0	0
111	60	Female	Health professional	No	37	4	1	1	0	1	0	0	1	0	0	0	0	0	0	0	0	1	0	0	0	0	1	0	0	0	0	0	94	0	0	0	0	0	0	0	0	0	0	0	0	0	0	0	0
112	49	Female	Health professional	No	37	2	1	1	0	1	0	1	1	0	0	0	1	0	0	0	0	0	0	0	0	0	NA	NA	NA	NA	NA	NA	NA	1	0	0	0	0	0	0	1	0	0	0	0	0	0	0	0
113	60	Female	Health professional	NA	37	2	0	1	0	0	0	0	0	0	0	0	1	0	0	0	0	0	0	1	0	0	NA	NA	NA	NA	NA	NA	NA	1	0	0	0	0	0	0	0	0	0	0	0	0	0	0	0
114	77	Female	Other type of exposure	No	38	3	1	0	1	0	0	1	0	0	0	0	0	1	0	0	0	0	0	0	0	0	0	0	0	0	0	0	95	1	1	0	0	0	0	1	0	1	0	0	0	0	0	0	0
115	62	Male	Other health workers	NA	37	0	0	0	0	1	0	0	0	0	0	0	0	0	0	0	0	0	0	0	0	0	NA	NA	NA	NA	NA	NA	NA	1	1	0	0	0	0	0	0	0	1	0	0	0	0	0	0
116	75	Female	Other type of exposure	No	38	6	1	0	0	0	0	0	0	0	1	0	0	1	0	0	0	0	0	0	0	0	1	0	0	0	0	0	91	1	0	0	0	0	1	0	0	0	0	0	0	0	0	0	0
117	55	Female	Health professional	Yes	38	1	1	1	0	0	0	0	0	0	0	0	0	0	0	0	0	0	0	0	0	0	NA	NA	NA	NA	NA	NA	NA	1	1	0	0	0	0	0	0	0	0	0	0	0	1	0	0
118	84	Male	Other type of exposure	NA	39.2	6	0	1	0	0	0	0	0	0	0	0	0	0	0	0	0	0	0	0	0	0	1	1	0	0	0	0	93	1	0	0	0	0	1	1	1	0	0	0	0	0	0	0	0
119	75	Female	Other type of exposure	Yes	38	6	0	1	0	0	0	1	0	0	0	0	0	0	0	0	0	0	0	0	0	0	1	0	0	0	0	0	NA	1	0	0	0	0	1	0	0	0	1	0	0	0	0	0	1
120	78	Male	Other type of exposure	Yes	36	1	1	1	0	0	0	1	0	0	0	0	0	0	0	0	0	0	0	0	0	0	0	0	0	0	0	0	96	1	1	0	0	0	1	0	0	0	0	0	0	0	0	0	0
121	74	Female	Other type of exposure	No	39	7	1	0	0	1	0	0	0	0	0	0	0	0	0	0	0	0	0	0	0	0	0	1	0	0	0	0	NA	1	1	0	0	0	0	0	0	0	0	1	1	0	0	0	0
122	36	Male	Health professional	No	38.5	1	1	1	1	1	0	1	1	0	0	0	0	0	0	0	0	0	0	0	0	1	0	0	0	0	1	0	98	0	0	0	0	0	0	0	0	0	0	0	0	0	0	0	0
123	55	Male	Other type of exposure	No	38	4	0	0	0	0	0	0	0	0	0	0	0	0	0	1	0	0	0	0	0	0	1	1	0	0	0	0	97	0	0	0	0	0	0	0	0	0	0	0	0	0	0	0	0
124	69	Male	Other type of exposure	Yes	38	0	1	1	1	0	0	0	0	0	0	0	0	0	1	0	0	0	0	0	1	0	1	1	1	0	0	0	89	1	1	0	1	0	0	0	1	0	0	0	0	0	0	0	1
125	45	Female	Health professional	No	36.8	0	0	0	0	0	0	0	0	1	1	0	0	0	0	0	0	0	0	0	0	0	NA	NA	NA	NA	NA	NA	NA	0	0	0	0	0	0	0	0	0	0	0	0	0	0	0	0
126	47	Female	Health professional	Yes	37.3	2	0	0	0	0	0	0	0	0	0	1	1	0	0	0	0	0	0	0	0	0	0	0	0	1	0	0	NA	1	0	0	0	0	0	0	0	0	0	0	1	0	0	0	0
127	36	Female	Other type of exposure	No	38.5	2	1	0	0	1	0	0	0	0	0	0	0	0	0	0	0	0	0	0	0	0	1	0	1	0	0	0	97	1	0	0	0	0	0	0	0	1	0	0	0	0	0	0	0
128	84	Female	Other type of exposure	No	36.9	5	1	1	0	0	0	0	0	0	0	0	0	0	0	0	0	0	0	0	0	0	1	0	0	0	0	0	90	1	1	0	0	1	0	1	0	0	0	0	0	0	0	0	0
129	54	Male	Other type of exposure	No	37	1	1	1	0	0	0	0	0	0	0	0	0	0	0	0	0	0	0	0	0	0	1	0	0	0	0	0	98	1	0	0	0	1	0	0	0	0	0	0	0	0	0	0	0
130	55	Female	Other health workers	Yes	37.5	0	1	0	0	0	0	0	1	0	0	0	0	1	0	0	0	0	0	0	0	0	NA	NA	NA	NA	NA	NA	NA	0	0	0	0	0	0	0	0	0	0	0	0	0	0	0	0
131	38	Female	Health professional	Yes	37.9	1	1	1	1	1	0	0	0	0	0	0	0	0	1	0	0	0	0	0	0	0	0	0	0	1	0	0	98	1	0	0	0	0	0	0	0	0	0	0	0	0	0	0	0
132	39	Female	Health professional	NA	36	5	0	0	0	0	0	0	0	1	0	0	0	0	0	0	0	0	0	0	0	0	NA	NA	NA	NA	NA	NA	NA	0	0	0	0	0	0	0	0	0	0	0	0	0	0	0	0
133	35	Female	Health professional	No	37	2	1	0	0	1	0	0	0	0	0	0	0	1	0	1	0	0	0	0	0	0	0	0	0	0	0	0	98	0	0	0	0	0	0	0	0	0	0	0	0	0	0	0	0
134	75	Male	Other type of exposure	No	38	5	1	0	0	0	1	0	0	0	0	0	0	0	1	0	0	0	0	0	0	0	1	1	0	0	0	0	83	1	1	0	0	0	0	0	1	0	0	0	0	0	0	0	0
135	72	Male	Other type of exposure	Yes	38	5	1	0	0	0	1	0	0	0	0	0	0	0	0	0	0	0	0	0	0	0	1	0	0	0	0	0	90	1	1	0	1	1	0	0	0	0	0	0	1	0	0	0	0
136	76	Male	Other type of exposure	Yes	38.3	2	1	0	0	0	1	0	0	0	0	0	0	0	1	0	0	0	0	0	0	0	1	1	0	0	0	0	92	1	1	1	0	1	0	0	0	0	0	0	1	0	0	0	0
137	60	Female	Health professional	No	37	0	1	1	0	0	0	0	0	0	0	0	0	0	0	0	0	0	0	0	0	0	NA	NA	NA	NA	NA	NA	NA	0	0	0	0	0	0	0	0	0	0	0	0	0	0	0	0
138	68	Female	Other type of exposure	No	37.3	3	1	1	0	1	0	0	0	0	0	0	1	0	0	0	0	0	0	0	0	0	1	0	0	0	0	0	98	1	0	0	0	1	0	0	0	0	0	0	0	0	0	0	0
139	72	Male	Other type of exposure	No	37.8	1	1	0	0	0	0	0	0	0	0	1	0	0	0	0	0	0	0	0	0	0	1	0	0	0	0	0	97	1	1	1	0	0	1	1	1	0	0	0	0	0	0	0	0
140	46	Male	Other type of exposure	No	38.1	10	1	1	0	0	0	0	0	0	0	0	0	0	0	0	0	0	0	0	0	0	1	1	1	0	0	0	92	1	0	1	1	1	0	0	0	0	0	0	0	0	0	0	0
141	65	Male	Other type of exposure	Yes	36.8	0	1	0	0	0	0	0	0	0	0	0	0	0	0	0	0	0	0	0	0	0	0	0	0	0	0	0	95	1	0	0	0	1	0	0	0	0	0	0	0	0	0	0	0
142	45	Female	Health professional	Yes	37	0	1	0	0	1	0	0	0	0	0	1	0	0	0	0	0	0	0	0	0	0	NA	NA	NA	NA	NA	NA	NA	0	0	0	0	0	0	0	0	0	0	0	0	0	0	0	0
143	60	Male	Health professional	No	36.1	12	1	1	0	0	0	0	0	1	0	0	1	0	1	0	0	0	0	0	0	0	0	0	0	0	0	0	NA	0	0	0	0	0	0	0	0	0	0	0	0	0	0	0	0
144	29	Male	Health professional	No	37	0	0	1	0	0	0	0	0	0	0	0	0	0	0	0	0	0	0	1	0	0	NA	NA	NA	NA	NA	NA	NA	0	0	0	0	0	0	0	0	0	0	0	0	0	0	0	0
145	28	Male	Health professional	No	36.5	0	1	0	0	0	0	0	0	1	1	1	0	0	0	0	0	0	0	0	0	0	0	0	0	1	0	0	NA	0	0	0	0	0	0	0	0	0	0	0	0	0	0	0	0
146	51	Male	Other type of exposure	No	38	0	1	1	0	0	1	0	0	0	0	0	0	0	0	0	0	0	0	0	0	0	1	0	0	0	0	0	91	0	0	0	0	0	0	0	0	0	0	0	0	0	0	0	0
147	36	Male	Other type of exposure	Yes	NA	0	0	0	0	0	0	0	0	0	0	0	0	0	0	0	0	0	0	0	0	0	NA	NA	NA	NA	NA	NA	NA	1	0	0	0	0	0	0	0	0	0	1	0	0	0	0	0
148	61	Male	Other type of exposure	Yes	37.6	0	0	1	0	0	0	1	0	0	0	0	0	0	0	0	0	0	0	0	0	0	NA	NA	NA	NA	NA	NA	NA	1	1	1	0	0	0	0	0	0	0	0	0	0	0	0	0
149	70	Male	Other type of exposure	No	39	6	0	0	0	0	1	0	0	0	0	0	0	0	0	0	0	0	0	0	0	0	1	1	0	0	0	0	92	0	0	0	0	0	0	0	0	0	0	0	0	0	0	0	0
150	64	Female	Other type of exposure	No	39	1	0	1	0	0	0	0	0	0	0	1	0	0	0	0	0	0	0	0	0	0	0	0	0	1	0	0	98	1	0	0	0	0	0	0	0	0	0	0	0	0	0	0	0
151	78	Female	Other type of exposure	No	37.8	1	1	1	0	1	0	1	0	0	0	0	0	0	0	0	0	0	0	0	0	0	1	0	0	1	0	0	95	1	0	0	0	0	1	0	0	0	0	1	0	1	0	0	0
152	66	Female	Health professional	Yes	38	2	1	0	0	0	0	0	0	0	0	0	0	0	0	0	0	0	0	0	0	0	1	0	0	1	0	0	98	1	1	0	0	1	0	0	0	0	0	0	1	0	0	1	0
153	38	Male	Health professional	No	37.5	12	1	1	0	0	0	1	1	1	1	0	0	0	0	0	0	0	0	1	0	0	NA	NA	NA	NA	NA	NA	NA	0	0	0	0	0	0	0	0	0	0	0	0	0	0	0	0
154	45	Male	Other type of exposure	NA	37	6	0	0	0	0	0	1	0	0	0	0	0	0	0	0	0	0	0	0	0	0	0	0	0	1	0	0	NA	1	0	0	0	0	0	0	0	0	0	0	0	0	0	0	0
155	58	Male	Other health workers	Yes	37.5	3	0	0	0	1	0	1	0	0	0	0	0	0	0	0	0	0	0	0	0	0	NA	NA	NA	NA	NA	NA	NA	1	0	0	0	1	0	0	0	0	0	0	0	0	0	0	0
156	31	Female	Health professional	NA	36.8	6	1	1	0	1	0	0	1	1	1	0	0	0	0	1	1	0	0	0	0	0	NA	NA	NA	NA	NA	NA	NA	1	0	0	0	0	0	0	0	0	0	0	0	0	0	0	0
157	26	Male	Health professional	NA	36.8	3	1	1	0	0	0	1	0	1	1	0	1	0	0	0	0	0	0	0	0	0	NA	NA	NA	NA	NA	NA	NA	0	0	0	0	0	0	0	0	0	0	0	0	0	0	0	0
158	58	Male	Other type of exposure	NA	38	6	0	1	1	0	0	0	1	0	0	0	0	0	0	0	0	0	0	0	0	0	1	0	0	0	0	0	NA	1	0	0	1	1	0	0	0	0	0	0	0	0	0	1	0
159	37	Male	Health professional	No	38.5	9	1	0	0	1	0	0	0	0	0	0	0	0	0	0	0	0	0	0	0	0	NA	NA	NA	NA	NA	NA	NA	0	0	0	0	0	0	0	0	0	0	0	0	0	0	0	0
160	66	Female	Health professional	No	38	10	1	0	1	1	0	0	0	0	0	0	0	0	0	0	0	0	0	0	0	0	1	0	0	0	0	0	94	1	0	0	0	0	0	0	0	0	0	1	0	0	0	0	0
161	32	Female	Health professional	Yes	38.5	0	1	1	0	1	0	0	1	1	1	0	0	0	0	0	0	0	0	0	0	0	NA	NA	NA	NA	NA	NA	NA	1	0	0	0	0	0	0	0	0	0	0	0	0	0	0	0
162	35	Female	Health professional	No	39	4	1	0	0	1	0	1	0	0	0	0	0	0	0	0	0	0	0	0	0	0	1	0	0	0	0	0	NA	1	0	0	1	0	0	0	0	0	0	0	0	0	1	1	0
163	42	Male	Other type of exposure	NA	38	0	1	0	0	0	0	0	1	0	0	0	0	0	0	1	1	0	0	0	0	0	1	0	0	0	0	0	97	1	1	0	1	0	0	0	0	0	0	0	0	0	0	0	0
164	47	Male	Other type of exposure	No	38.8	1	1	1	1	1	0	0	0	1	1	0	0	0	0	0	0	0	0	0	0	0	1	0	0	0	0	0	96	1	0	0	1	0	0	0	0	0	0	0	0	0	0	0	0
165	60	Male	Health professional	No	38.5	11	1	0	0	1	0	0	0	0	0	0	0	0	0	0	0	0	0	0	0	0	NA	NA	NA	NA	NA	NA	NA	1	1	1	0	0	0	0	0	0	0	0	0	0	0	0	0
166	36	Female	Health professional	No	37.5	0	1	0	1	0	0	1	1	1	0	0	0	0	0	0	0	0	0	0	0	0	NA	NA	NA	NA	NA	NA	NA	0	0	0	0	0	0	0	0	0	0	0	0	0	0	0	0
167	44	Male	Other type of exposure	No	38	7	1	0	0	0	1	1	0	0	0	0	0	1	0	0	0	0	0	0	0	0	1	0	0	0	0	0	93	0	0	0	0	0	0	0	0	0	0	0	0	0	0	0	0
168	28	Female	Health professional	No	37.5	1	0	0	0	0	0	0	0	0	0	1	0	0	0	0	0	0	0	0	0	0	NA	NA	NA	NA	NA	NA	NA	0	0	0	0	0	0	0	0	0	0	0	0	0	0	0	0
169	43	Female	Health professional	No	36	0	0	0	1	0	0	0	0	0	0	0	0	0	0	0	0	0	0	0	0	0	NA	NA	NA	NA	NA	NA	NA	0	0	0	0	0	0	0	0	0	0	0	0	0	0	0	0
170	37	Female	Health professional	No	38	0	0	1	0	0	0	0	0	0	0	0	0	0	0	0	0	0	0	0	0	0	NA	NA	NA	NA	NA	NA	NA	0	0	0	0	0	0	0	0	0	0	0	0	0	0	0	0
171	70	Male	Other type of exposure	No	38	5	1	1	1	1	0	0	0	0	0	0	0	1	0	0	0	0	0	0	0	0	1	0	0	0	0	0	98	1	1	0	0	0	0	1	0	0	0	0	0	0	0	0	0
172	77	Female	Other type of exposure	No	38	1	1	0	0	0	1	1	0	0	0	0	0	0	0	0	0	0	0	0	0	0	0	1	0	0	0	0	93	1	1	0	0	1	1	0	0	0	0	0	0	0	0	0	0
173	68	Male	Other type of exposure	Yes	38	10	1	0	0	0	1	0	0	0	0	1	0	0	0	0	0	0	0	0	0	0	0	1	0	0	0	0	95	1	0	0	1	0	0	0	0	1	0	0	0	0	0	0	0
174	95	Female	Other type of exposure	No	37.4	0	1	0	1	0	0	0	0	0	1	0	0	0	0	0	0	0	0	0	0	0	1	1	0	0	0	0	92	1	1	1	0	0	0	1	0	0	0	0	0	0	0	0	0
175	55	Female	Other type of exposure	No	37.9	6	1	1	0	0	1	0	0	0	0	0	0	0	1	0	0	0	0	0	0	0	1	0	0	0	0	0	100	1	1	0	1	0	0	0	0	0	0	0	0	0	0	0	0
176	62	Male	Other type of exposure	No	38	0	1	0	0	1	0	0	0	1	1	0	0	0	0	0	0	0	0	0	0	0	1	1	0	0	0	0	95	1	1	0	1	0	0	0	0	0	0	0	0	0	0	0	0
177	48	Female	Health professional	No	37.5	1	0	0	0	0	0	0	1	0	0	0	0	0	0	0	0	0	0	0	0	0	NA	NA	NA	NA	NA	NA	NA	0	0	0	0	0	0	0	0	0	0	0	0	0	0	0	0
178	78	Female	Other type of exposure	No	38.1	7	1	0	0	0	1	0	0	0	0	0	0	0	0	0	0	0	0	0	0	0	1	0	0	0	0	0	95	0	0	0	0	0	0	0	0	0	0	0	0	0	0	0	0
179	86	Male	Other type of exposure	No	36.1	7	1	1	0	1	1	0	0	0	0	0	0	0	0	0	0	0	0	0	0	0	1	1	0	0	0	0	95	1	1	0	0	1	1	1	0	1	0	0	0	1	0	0	0
180	73	Male	Other type of exposure	No	37.8	0	1	0	0	0	0	0	1	0	0	0	0	0	0	0	0	0	0	0	0	0	0	0	0	0	0	0	97	1	1	0	0	0	1	0	0	1	0	0	0	0	0	0	0
181	50	Male	Other type of exposure	Yes	39	3	1	1	1	1	0	0	1	0	0	0	0	0	0	0	0	0	0	0	0	0	1	1	0	0	0	0	95	1	1	0	0	0	0	0	0	0	0	0	0	0	0	0	0
182	74	Male	Other type of exposure	NA	36.8	8	1	1	1	0	0	1	0	0	0	0	0	1	0	0	0	0	0	0	0	0	1	0	0	0	0	0	96	1	1	1	0	0	0	1	0	0	1	1	0	0	0	1	0
183	31	Female	Health professional	No	36.8	1	0	0	0	1	0	1	0	1	1	1	0	0	0	0	0	0	0	0	0	0	NA	NA	NA	NA	NA	NA	NA	0	0	0	0	0	0	0	0	0	0	0	0	0	0	0	0
184	56	Female	Health professional	No	37	4	0	0	0	1	0	0	0	0	0	0	0	1	0	0	0	0	0	0	0	0	NA	NA	NA	NA	NA	NA	NA	0	0	0	0	0	0	0	0	0	0	0	0	0	0	0	0
185	24	Male	Health professional	No	36.8	0	0	1	0	0	0	0	1	0	0	0	0	0	0	0	0	0	0	0	0	0	NA	NA	NA	NA	NA	NA	NA	1	0	0	0	0	0	0	0	0	0	0	0	0	0	0	0
186	66	Female	Other type of exposure	No	36.5	10	1	0	1	0	0	0	0	0	0	0	0	0	0	0	0	0	0	0	0	0	1	1	0	0	0	0	92	1	0	0	0	0	0	0	0	0	1	0	0	0	0	0	0
187	63	Male	Other type of exposure	No	38	10	0	1	1	0	1	0	0	0	0	0	0	0	0	0	0	0	0	0	0	0	1	1	0	0	0	0	96	0	0	0	0	0	0	0	0	0	0	0	0	0	0	0	0
188	65	Male	Other type of exposure	Yes	38.7	10	1	0	0	0	0	1	0	0	0	0	0	0	0	0	0	0	0	0	0	0	0	0	0	1	0	0	98	1	1	0	0	1	0	0	0	0	0	1	0	1	0	0	0
189	80	Male	Other type of exposure	Yes	37.5	5	0	1	1	0	0	1	1	0	0	0	0	0	0	1	0	0	0	0	0	0	1	0	1	0	0	0	95	1	1	1	0	0	0	0	0	0	0	0	0	1	0	0	0
190	62	Female	Other type of exposure	Yes	38.5	2	1	0	0	0	0	0	0	0	0	0	0	0	0	0	1	0	0	0	0	0	1	1	1	0	0	0	97	1	0	0	0	1	0	0	0	0	1	1	0	1	0	0	0
191	30	Female	Health professional	No	36.8	2	0	0	0	0	0	1	1	1	1	0	0	0	0	0	0	0	0	0	0	0	NA	NA	NA	NA	NA	NA	NA	0	0	0	0	0	0	0	0	0	0	0	0	0	0	0	0
192	55	Female	Other type of exposure	Yes	38.5	13	1	1	1	1	0	0	0	0	0	0	0	0	0	0	0	0	0	0	0	0	1	0	0	0	0	0	95	1	0	1	1	1	0	0	0	0	1	0	0	0	0	0	0
193	72	Female	Other type of exposure	No	38	8	1	1	1	1	0	0	0	0	0	0	0	0	0	0	1	0	0	0	0	0	1	0	0	0	0	0	97	1	0	0	0	0	0	0	0	0	0	1	0	0	0	0	0
194	74	Male	Other type of exposure	Yes	38	10	1	0	0	1	0	1	0	0	0	0	0	0	0	0	0	0	0	0	0	0	1	1	0	0	0	0	85	1	1	1	0	0	0	0	0	0	1	0	0	0	0	0	0
195	55	Male	Other type of exposure	No	38	2	1	0	0	0	0	0	0	0	0	0	0	0	0	0	0	0	0	0	0	0	1	0	0	0	0	0	95	0	0	0	0	0	0	0	0	0	0	0	0	0	0	0	0
196	55	Male	Other type of exposure	No	38.5	0	1	0	0	0	1	0	0	0	0	0	0	0	0	1	0	0	0	0	0	0	1	1	0	0	0	0	98	1	1	0	1	0	0	0	0	0	0	0	0	0	0	0	0
197	29	Male	Health professional	No	37.6	4	1	0	1	0	0	0	0	0	0	0	0	0	0	0	0	0	0	0	0	0	0	0	1	0	0	0	100	0	0	0	0	0	0	0	0	0	0	0	0	0	0	0	0
198	74	Female	Other type of exposure	No	37.9	4	1	1	1	0	0	0	0	1	1	0	0	0	0	0	0	0	0	0	0	0	1	1	0	0	0	0	95	1	1	1	0	0	0	0	0	0	0	0	1	0	0	0	0
199	79	Female	Other type of exposure	No	37.5	2	1	1	0	0	0	1	0	0	1	0	1	1	0	0	0	0	0	0	0	0	1	1	0	0	0	0	93	0	0	0	0	0	0	0	0	0	0	0	0	0	0	0	0
200	89	Male	Other type of exposure	Yes	37	1	0	1	0	0	0	0	0	0	0	0	0	0	0	1	0	0	0	0	0	0	1	0	0	0	0	0	96	1	1	0	0	0	0	0	0	0	0	0	0	0	0	0	1
201	62	Male	Other type of exposure	No	38	8	1	0	0	1	0	1	1	0	0	0	0	0	0	0	0	0	0	0	0	0	1	1	0	0	0	0	95	0	0	0	0	0	0	0	0	0	0	0	0	0	0	0	0
202	44	Male	Health professional	NA	38.7	0	1	0	1	1	0	1	0	0	0	0	0	1	0	0	0	0	0	0	0	0	NA	NA	NA	NA	NA	NA	NA	0	0	0	0	0	0	0	0	0	0	0	0	0	0	0	0
203	30	Male	Health professional	NA	38	31	1	0	0	0	0	0	0	0	0	0	0	0	0	0	0	0	0	0	0	0	NA	NA	NA	NA	NA	NA	NA	1	0	0	0	0	0	0	0	1	0	0	0	0	0	0	0
204	64	Female	Health professional	NA	37.8	4	1	0	0	0	0	0	0	0	0	0	0	0	0	0	0	0	0	0	0	0	NA	NA	NA	NA	NA	NA	NA	1	0	0	0	0	1	0	0	0	0	0	0	0	0	0	0
205	56	Male	Health professional	No	38.3	0	1	1	0	1	0	0	0	0	0	1	0	0	0	0	0	0	0	0	0	0	NA	NA	NA	NA	NA	NA	NA	0	0	0	0	0	0	0	0	0	0	0	0	0	0	0	0
206	28	Female	Health professional	No	36.8	1	0	0	0	1	0	0	0	0	0	0	0	0	0	0	0	0	0	0	0	0	NA	NA	NA	NA	NA	NA	NA	1	0	0	0	0	0	0	0	0	0	0	0	0	0	0	0
207	53	Male	Other type of exposure	Yes	38	4	1	0	0	0	1	1	0	0	0	0	0	0	0	0	0	0	0	0	0	0	0	0	0	0	0	0	96	0	0	0	0	0	0	0	0	0	0	0	0	0	0	0	0
208	68	Male	Other type of exposure	Yes	37	5	1	0	1	1	0	0	0	0	0	0	0	0	0	0	0	0	0	0	0	0	0	0	0	0	0	0	97	1	1	0	0	0	1	1	0	0	0	0	0	0	0	0	0
209	50	Male	Other type of exposure	No	38	5	1	0	0	0	1	0	0	0	0	0	0	0	0	0	0	0	0	0	0	0	1	0	1	0	0	0	92	1	0	0	0	0	0	0	0	0	0	0	1	0	0	0	0
210	86	Female	Other type of exposure	No	37.3	6	1	1	0	0	0	0	0	0	0	0	0	0	0	0	0	0	0	0	0	0	1	1	1	0	0	0	85	1	1	0	0	0	0	0	0	0	0	1	0	0	0	0	0
211	77	Male	Other type of exposure	Yes	39	7	1	1	1	0	1	0	0	0	0	0	0	0	0	1	1	0	0	0	0	0	1	1	0	0	0	0	97	1	1	1	0	1	0	0	0	1	1	1	0	0	0	0	0
212	86	Female	Other type of exposure	No	38	4	1	0	1	0	0	0	0	0	0	0	0	0	0	1	0	0	0	0	0	0	1	0	0	0	0	0	90	1	1	1	1	0	1	1	1	0	0	0	0	0	0	0	0
213	33	Male	Other type of exposure	No	37.8	1	1	0	0	0	0	0	0	0	0	1	0	0	0	0	0	0	0	0	0	0	0	0	0	0	0	0	99	1	0	0	0	0	0	1	0	0	0	0	0	0	0	0	0
214	86	Female	Other type of exposure	No	37.2	0	0	1	0	0	0	1	0	0	0	0	0	1	0	0	0	0	0	0	0	0	1	1	0	0	0	0	94	1	1	1	1	1	0	0	0	0	0	0	0	0	0	0	0
215	65	Female	Health professional	No	38	3	1	0	0	0	0	1	1	0	0	1	1	0	0	0	0	0	0	0	0	0	0	0	0	1	0	0	98	1	1	0	0	1	0	0	0	0	0	0	0	0	0	0	0
216	81	Male	Other type of exposure	Yes	38	NA	0	1	0	0	0	0	0	0	0	0	0	0	0	0	0	0	0	0	0	0	0	0	0	0	0	0	99	1	1	0	0	0	0	1	1	0	0	0	0	0	0	0	0
217	79	Male	Other type of exposure	Yes	39	6	1	1	0	1	0	0	0	0	0	0	0	0	0	0	0	0	0	0	0	0	0	0	0	1	0	0	99	1	0	0	0	0	1	1	0	1	0	0	0	0	1	0	0
218	76	Female	Other type of exposure	Yes	37	2	1	0	1	0	1	0	0	0	0	0	0	0	0	0	0	0	0	0	0	0	1	0	0	0	0	0	98	1	1	0	1	0	0	0	0	0	1	0	0	0	1	1	0
219	51	Female	Other type of exposure	No	36	0	1	1	0	0	1	1	0	0	0	0	0	1	1	1	0	0	0	0	0	0	1	0	0	0	0	0	98	1	1	0	1	0	0	0	0	0	0	1	0	0	0	0	0
220	23	Female	Health professional	No	37.5	0	1	0	0	0	0	0	0	1	1	0	1	0	0	0	0	0	0	0	0	0	NA	NA	NA	NA	NA	NA	NA	0	0	0	0	0	0	0	0	0	0	0	0	0	0	0	0
221	70	Female	Other type of exposure	Yes	38.5	3	1	1	0	1	0	1	1	0	0	0	0	0	0	0	1	0	0	0	0	0	0	0	0	1	0	0	98	1	1	0	0	0	0	0	0	0	0	0	0	0	0	0	0
222	27	Female	Health professional	No	38	4	1	1	0	0	0	0	1	1	1	0	1	0	0	0	0	0	0	0	0	0	NA	NA	NA	NA	NA	NA	NA	0	0	0	0	0	0	0	0	0	0	0	0	0	0	0	0
223	72	Male	Other type of exposure	No	38.5	3	1	0	0	0	0	0	0	0	0	0	0	0	0	0	0	0	0	0	0	0	1	0	0	0	0	0	97	1	1	1	0	1	0	0	0	0	0	0	0	0	0	0	0
224	51	Female	Other type of exposure	Yes	37.5	0	1	0	0	0	1	1	0	0	0	0	0	0	1	0	0	0	0	0	0	0	1	0	0	0	0	0	96	1	0	0	0	0	1	0	0	0	0	0	0	1	0	0	0
225	90	Male	Other type of exposure	No	37	0	1	1	0	0	1	0	0	0	0	0	0	0	0	0	0	0	0	0	0	0	1	1	0	0	0	0	95	1	1	1	1	0	0	0	0	0	0	0	0	0	0	0	0
226	79	Female	Other type of exposure	No	NA	31	1	0	0	0	1	0	0	0	0	0	0	0	0	0	0	0	0	0	0	0	0	1	0	0	0	0	85	1	1	0	0	0	0	0	0	0	0	0	0	0	0	0	1
227	62	Male	Other type of exposure	No	38.2	9	1	0	0	1	0	0	0	0	0	0	1	0	0	0	0	0	0	0	0	0	1	0	0	0	0	0	96	1	1	0	0	0	0	0	0	0	0	0	0	0	0	0	0
228	78	Male	Other type of exposure	No	39	3	0	0	0	0	1	0	0	0	0	0	0	0	0	0	0	0	1	0	0	0	1	1	1	0	0	0	94	0	0	0	0	0	0	0	0	0	0	0	0	0	0	0	0
229	72	Male	Other type of exposure	No	38	0	1	1	1	1	0	0	1	0	0	0	0	0	0	0	0	0	0	0	0	0	1	0	0	0	0	0	NA	1	0	0	0	0	1	0	0	0	0	0	0	0	0	0	0
230	29	Male	Health professional	No	37.2	4	0	0	0	0	0	0	1	0	0	1	0	0	0	0	0	0	0	0	0	0	0	0	0	0	0	0	98	1	0	0	0	0	0	0	0	0	0	0	0	0	0	0	0
231	27	Female	Health professional	NA	37.4	0	0	0	0	1	0	0	0	0	0	0	0	0	0	0	0	0	0	0	0	0	0	0	0	0	0	0	NA	0	0	0	0	0	0	0	0	0	0	0	0	0	0	0	0
232	68	Female	Other type of exposure	No	38.5	14	1	1	1	0	0	0	0	0	0	0	1	0	0	0	0	0	0	0	0	0	1	1	1	0	0	0	89	1	1	0	0	1	0	0	0	0	0	0	0	0	0	0	0
233	71	Female	Other type of exposure	Yes	38.2	7	1	1	1	0	0	0	0	0	0	0	0	0	0	0	0	0	1	0	0	0	NA	NA	NA	NA	NA	NA	NA	1	1	0	1	1	0	0	0	0	0	1	0	0	0	0	0
234	59	Female	Other type of exposure	No	37.9	10	1	0	0	1	0	0	0	0	0	0	0	1	0	0	0	0	0	0	0	0	1	0	0	0	0	0	98	1	0	1	0	1	0	0	0	0	0	0	0	0	0	0	0
235	94	Female	Other type of exposure	No	37	3	1	0	1	0	0	1	0	0	0	0	0	0	0	0	0	0	0	0	0	0	1	0	0	0	0	0	94	1	1	0	0	0	0	1	0	0	0	1	0	0	0	0	0
236	37	Female	Health professional	No	37	1	1	0	1	1	0	0	0	0	0	0	1	0	0	0	1	0	0	0	0	0	0	0	0	1	0	0	99	0	0	0	0	0	0	0	0	0	0	0	0	0	0	0	0
237	22	Female	Health professional	No	37.1	0	1	0	0	0	1	0	1	0	0	0	0	0	0	0	0	0	0	0	0	0	0	0	1	0	0	0	97	0	0	0	0	0	0	0	0	0	0	0	0	0	0	0	0
238	51	Female	Health professional	NA	36	5	0	0	1	0	1	0	0	0	0	0	1	0	0	0	0	0	0	0	0	0	NA	NA	NA	NA	NA	NA	NA	0	0	0	0	0	0	0	0	0	0	0	0	0	0	0	0
239	66	Male	Other type of exposure	No	36	0	0	0	0	0	1	0	0	0	0	0	0	0	0	0	0	0	0	0	0	0	0	1	0	0	0	0	82	1	1	1	0	0	1	0	0	0	0	0	0	0	0	0	0
240	66	Male	Other type of exposure	No	38.4	10	1	0	1	0	1	0	0	0	0	0	0	0	0	0	0	0	0	0	0	0	0	1	0	0	0	0	96	1	1	0	0	0	0	0	0	0	0	0	0	0	0	0	0
241	65	Female	Other type of exposure	No	37.5	9	1	1	1	1	1	0	0	0	0	0	0	1	0	0	0	0	0	0	0	0	1	0	0	0	0	0	91	1	1	1	0	0	1	0	0	0	0	0	0	0	0	0	0
242	35	Male	Health professional	NA	37	2	0	1	0	1	0	0	0	1	1	0	0	0	0	0	0	0	0	0	0	0	NA	NA	NA	NA	NA	NA	NA	0	0	0	0	0	0	0	0	0	0	0	0	0	0	0	0
243	47	Male	Health professional	No	38	7	1	1	1	1	1	0	0	1	1	0	0	0	0	0	0	0	0	0	0	0	NA	NA	NA	NA	NA	NA	97	0	0	0	0	0	0	0	0	0	0	0	0	0	0	0	0
244	75	Male	Other type of exposure	Yes	38	2	1	0	0	0	0	0	0	0	0	0	0	0	0	0	0	0	0	0	0	0	1	1	0	0	0	0	95	1	1	0	0	1	0	0	0	0	0	0	0	0	0	0	0
245	30	Male	Health professional	NA	37.8	1	1	1	0	0	0	0	1	1	1	0	0	0	0	0	0	0	0	0	0	0	NA	NA	NA	NA	NA	NA	NA	0	0	0	0	0	0	0	0	0	0	0	0	0	0	0	0
246	37	Female	Health professional	No	37	0	1	0	0	0	0	0	0	0	0	0	0	0	0	0	0	0	0	0	0	0	NA	NA	NA	NA	NA	NA	NA	0	0	0	0	0	0	0	0	0	0	0	0	0	0	0	0
247	39	Female	Health professional	No	37.2	5	1	0	1	0	1	0	1	0	0	0	0	1	0	0	0	0	0	0	0	0	1	1	0	0	0	0	96	0	0	0	0	0	0	0	0	0	0	0	0	0	0	0	0
248	62	Male	Other type of exposure	Yes	37.5	6	1	1	1	0	0	1	0	1	1	1	0	0	0	0	0	0	0	0	0	0	1	1	1	0	0	0	96	1	1	0	0	0	0	0	0	0	1	0	0	0	0	1	0
249	20	Female	Other type of exposure	No	36.5	0	1	0	0	0	0	0	1	0	0	0	1	0	0	0	0	0	0	0	0	0	0	0	0	0	0	0	NA	0	0	0	0	0	0	0	0	0	0	0	0	0	0	0	0
250	57	Male	Other type of exposure	No	38	32	1	1	1	1	1	0	0	0	0	1	0	1	1	0	0	0	0	0	0	0	1	1	0	0	0	0	98	1	0	0	0	1	0	0	0	0	0	0	0	0	0	0	0
251	72	Male	Other type of exposure	No	37.2	8	1	1	1	1	1	0	0	0	0	1	0	1	1	0	0	0	0	0	0	0	1	0	0	0	0	0	96	1	1	1	0	0	0	0	0	0	0	1	0	0	0	0	0
252	39	Male	Health professional	No	36	0	1	1	0	1	0	0	0	0	1	0	0	0	1	0	0	0	0	0	0	0	NA	NA	NA	NA	NA	NA	NA	0	0	0	0	0	0	0	0	0	0	0	0	0	0	0	0
253	32	Female	Health professional	NA	36	2	0	0	1	1	0	0	1	0	0	1	1	0	0	0	0	0	0	0	0	0	NA	NA	NA	NA	NA	NA	NA	1	0	1	0	0	0	0	0	0	0	0	0	0	0	0	0
254	73	Female	Other type of exposure	Yes	NA	2	0	1	1	0	1	0	0	0	0	0	0	0	0	0	0	0	0	0	0	0	1	1	1	0	0	0	98	1	1	0	0	1	1	0	0	0	0	0	0	1	0	0	0
255	48	Female	Health professional	NA	36	NA	0	0	0	0	1	0	0	0	0	0	0	0	0	0	0	1	0	0	0	0	0	0	0	0	0	0	NA	0	0	0	0	0	0	0	0	0	0	0	0	0	0	0	0
256	49	Male	Other type of exposure	No	37	1	1	0	0	1	0	1	0	0	0	0	0	0	0	0	0	0	0	0	0	0	0	0	0	0	0	0	97	1	1	0	0	0	0	0	0	0	0	0	0	0	0	0	0
257	53	Female	Health professional	No	37.5	0	1	0	1	1	0	0	1	1	1	0	0	0	0	0	0	0	0	0	0	0	NA	NA	NA	NA	NA	NA	NA	1	0	0	1	0	0	0	0	0	0	0	0	0	0	0	0
258	58	Female	Other type of exposure	No	37	18	1	1	1	1	1	1	0	0	0	1	0	1	1	0	0	0	0	0	0	0	1	0	0	0	0	0	98	1	0	0	1	0	0	0	0	0	0	0	0	0	0	0	0
259	68	Male	Health professional	No	37.3	0	1	1	1	0	0	0	0	1	1	0	0	0	0	0	0	0	0	0	0	0	1	0	0	0	0	0	99	1	0	0	0	0	0	0	0	0	0	0	1	0	0	0	0
260	89	Male	Other type of exposure	Yes	37.1	10	1	0	1	1	1	0	0	0	0	0	0	0	0	0	0	0	0	0	0	0	1	1	1	0	0	0	91	1	1	0	0	0	0	0	1	1	1	0	0	0	0	0	0
261	63	Male	Other type of exposure	No	38	20	0	1	0	1	0	1	0	0	0	0	0	0	0	0	0	0	0	0	0	0	1	0	0	0	0	0	94	0	0	0	0	0	0	0	0	0	0	0	0	0	0	0	0
262	49	Male	Other type of exposure	Yes	36	7	1	0	0	1	0	0	0	0	0	0	0	0	0	0	0	0	0	0	0	0	1	0	0	0	0	0	96	1	0	0	1	0	0	0	0	0	0	0	0	0	0	0	0
263	72	Male	Other type of exposure	Yes	37.2	1	1	0	0	0	1	0	0	0	0	0	0	0	0	0	0	0	0	0	0	0	1	0	0	0	0	0	95	1	1	0	0	0	0	0	0	0	1	0	0	0	0	0	0
264	82	Female	Other type of exposure	No	37.7	1	1	0	1	0	0	0	0	0	0	0	0	0	0	0	0	0	0	0	0	0	1	1	0	0	0	0	91	1	1	0	0	0	1	0	0	0	0	0	0	0	0	0	0
265	37	Female	Other health workers	NA	NA	5	0	0	1	0	0	0	0	1	0	0	0	0	0	0	0	0	0	0	0	0	NA	NA	NA	NA	NA	NA	NA	0	0	0	0	0	0	0	0	0	0	0	0	0	0	0	0
266	48	Male	Other type of exposure	Yes	39	0	1	0	1	1	1	0	1	0	0	0	0	0	0	0	0	0	0	0	0	0	1	1	1	0	0	0	NA	0	0	0	0	0	0	0	0	0	0	0	0	0	0	0	0
267	81	Male	Other type of exposure	No	38	7	1	0	0	0	1	0	0	0	0	0	0	0	0	0	0	0	0	0	0	0	1	0	0	0	0	0	98	1	1	0	0	0	0	1	0	0	0	0	0	0	0	0	0
268	71	Male	Health professional	Yes	37.7	6	0	1	0	0	0	1	0	0	0	0	0	1	0	0	0	0	0	0	0	0	1	1	0	0	0	0	90	1	0	1	1	0	1	1	1	0	0	0	0	0	0	1	0
269	40	Female	Health professional	No	37.2	7	0	1	1	1	0	0	0	0	0	1	0	0	0	0	0	0	0	0	0	0	0	0	0	0	0	0	98	0	0	0	0	0	0	0	0	0	0	0	0	0	0	0	0
270	75	Male	Other type of exposure	No	39	0	0	0	1	0	1	0	0	0	0	0	0	0	0	1	0	0	0	0	0	0	0	1	0	0	0	0	92	1	0	0	0	0	1	0	0	1	0	0	0	0	0	0	1
271	61	Female	Health professional	No	38	9	1	1	1	0	0	0	0	0	0	0	0	0	1	0	0	0	0	0	0	0	1	0	0	0	0	0	98	0	0	0	0	0	0	0	0	0	0	0	0	0	0	0	0
272	82	Female	Other type of exposure	No	39	9	1	0	1	0	0	0	0	0	0	0	0	0	0	0	0	0	0	0	0	0	1	0	0	0	0	0	95	1	1	0	0	1	0	0	0	0	0	0	0	0	0	0	0
273	55	Male	Other type of exposure	No	38	15	1	1	0	1	1	0	0	0	0	1	0	0	0	0	0	0	0	0	0	0	1	1	0	0	0	0	NA	0	0	0	0	0	0	0	0	0	0	0	0	0	0	0	0
274	67	Male	Other type of exposure	Yes	38	4	1	0	0	0	0	0	0	0	0	0	0	0	0	0	0	0	0	0	1	0	1	0	0	0	0	0	73	1	0	1	0	0	0	0	0	0	0	0	0	1	0	0	0
275	93	Female	Other type of exposure	No	38.5	0	0	1	0	0	0	0	0	0	0	0	0	0	0	0	0	0	0	0	0	0	1	1	0	0	0	0	94	1	1	1	0	0	0	0	0	0	0	0	0	0	0	0	0
276	43	Female	Other type of exposure	NA	38.3	0	0	0	0	0	0	0	1	1	0	1	0	0	0	0	0	0	0	0	0	0	1	0	0	0	0	0	99	0	0	0	0	0	0	0	0	0	0	0	0	0	0	0	0
277	27	Male	Health professional	NA	NA	3	0	0	0	1	0	0	1	1	0	0	1	0	0	0	0	0	0	0	0	0	NA	NA	NA	NA	NA	NA	NA	0	0	0	0	0	0	0	0	0	0	0	0	0	0	0	0
278	63	Female	Other type of exposure	Yes	38.6	9	1	0	0	0	1	0	0	0	0	0	0	0	1	0	0	0	0	0	0	0	1	0	0	0	0	0	90	1	0	0	0	0	0	0	0	1	0	0	0	0	1	0	0
279	41	Male	Health professional	NA	NA	0	0	1	0	0	0	0	1	0	0	0	0	0	0	0	0	0	0	0	0	0	NA	NA	NA	NA	NA	NA	NA	0	0	0	0	0	0	0	0	0	0	0	0	0	0	0	0
280	72	Female	Other type of exposure	No	38.5	1	1	0	0	0	0	0	0	0	0	0	0	0	1	0	0	0	0	0	0	0	1	0	0	0	0	0	93	1	1	0	0	0	1	1	0	0	1	0	0	0	0	0	0
281	63	Female	Health professional	Yes	36.6	2	1	1	0	1	0	0	0	0	0	1	0	0	0	0	0	0	0	0	0	0	0	0	1	0	0	0	98	1	0	0	0	1	0	0	0	0	0	0	0	0	0	0	0
282	60	Female	Health professional	NA	37.5	0	0	0	1	0	0	0	0	0	0	0	0	0	0	0	0	0	0	0	0	0	NA	NA	NA	NA	NA	NA	NA	0	0	0	0	0	0	0	0	0	0	0	0	0	0	0	0
283	47	Female	Health professional	Yes	36	13	0	0	0	0	0	1	1	1	1	0	0	0	0	0	0	0	0	0	0	0	NA	NA	NA	NA	NA	NA	NA	1	0	0	1	0	0	0	0	0	0	0	0	0	0	0	0
284	76	Female	Other type of exposure	No	38.8	6	0	1	1	0	0	1	1	0	0	0	0	1	0	1	0	0	0	0	0	0	1	0	0	0	0	0	95	1	0	0	0	0	0	0	0	1	0	0	0	0	0	0	0
285	72	Male	Other type of exposure	Yes	38	4	0	0	0	0	0	1	0	0	0	0	0	0	0	1	0	0	0	0	0	0	0	0	0	0	0	0	96	1	0	0	0	0	1	0	0	0	0	0	0	0	0	0	0
286	56	Female	Other type of exposure	No	38	1	1	0	1	0	1	1	1	0	0	0	0	1	0	0	0	0	0	0	0	0	1	0	0	0	0	0	97	1	1	0	0	0	0	0	0	0	0	0	0	0	0	0	0
287	68	Female	Other type of exposure	No	39	0	1	1	1	0	0	0	0	1	0	0	0	0	1	1	0	0	0	0	0	0	0	0	0	0	0	0	96	1	0	1	1	0	0	0	0	0	0	0	0	0	0	0	0
288	48	Female	Health professional	NA	36	10	1	0	0	0	0	1	1	1	0	0	1	0	0	0	0	0	0	0	0	0	NA	NA	NA	NA	NA	NA	NA	0	0	0	0	0	0	0	0	0	0	0	0	0	0	0	0
289	49	Female	Health professional	No	36	2	0	0	1	0	0	0	0	1	1	0	0	1	0	0	0	0	0	0	0	0	NA	NA	NA	NA	NA	NA	NA	0	0	0	0	0	0	0	0	0	0	0	0	0	0	0	0
290	43	Female	Health professional	NA	36	0	0	0	0	1	0	0	0	0	0	1	0	0	0	0	0	0	0	0	0	0	NA	NA	NA	NA	NA	NA	NA	0	0	0	0	0	0	0	0	0	0	0	0	0	0	0	0
291	30	Male	Health professional	No	37.4	0	1	0	0	0	0	0	0	1	0	0	0	0	0	0	0	0	0	0	0	0	NA	NA	NA	NA	NA	NA	NA	0	0	0	0	0	0	0	0	0	0	0	0	0	0	0	0
292	46	Female	Health professional	Yes	37.5	2	1	1	0	0	1	1	1	0	0	0	0	1	0	0	0	0	0	0	0	0	1	0	0	1	0	0	97	1	0	0	0	0	0	0	0	0	0	0	0	0	0	0	0
293	39	Female	Health professional	NA	36	NA	1	0	1	0	0	1	0	1	0	0	0	0	0	0	0	0	0	0	0	0	NA	NA	NA	NA	NA	NA	NA	0	0	0	0	0	0	0	0	0	0	0	0	0	0	0	0
294	52	Male	Other type of exposure	NA	37.8	2	1	0	0	1	0	1	0	0	0	0	0	0	0	0	0	0	0	0	0	0	1	0	0	0	0	0	NA	0	0	0	0	0	0	0	0	0	0	0	0	0	0	0	0
295	51	Female	Other type of exposure	Yes	36	2	1	1	1	1	0	1	0	0	0	1	1	0	0	0	0	0	0	0	0	0	0	0	0	1	0	0	98	1	0	0	0	0	1	0	0	1	0	0	0	0	0	0	0
296	38	Male	Other type of exposure	NA	37.5	5	1	0	0	0	0	0	1	0	0	0	0	0	0	0	0	0	0	0	0	0	0	0	0	0	0	0	98	0	0	0	0	0	0	0	0	0	0	0	0	0	0	0	0
297	80	Female	Other type of exposure	No	38	0	1	0	0	0	1	0	0	0	0	0	0	0	0	0	0	0	0	0	0	0	1	0	0	1	0	0	94	1	0	0	0	1	1	0	0	0	0	0	0	0	0	0	0
298	79	Male	Other type of exposure	No	37	9	1	1	1	0	0	1	0	0	0	0	0	1	0	0	0	0	0	0	0	0	1	0	0	0	0	0	97	1	0	1	0	0	0	0	0	0	0	0	0	0	0	0	0
299	62	Female	Other type of exposure	No	38	3	1	1	1	1	1	1	1	0	0	0	0	1	0	0	0	0	0	0	0	0	NA	NA	NA	NA	NA	NA	97	1	0	0	0	1	0	0	0	0	0	0	0	0	0	0	0
300	86	Male	Other type of exposure	No	37.5	6	1	0	0	0	0	1	0	0	0	0	1	0	0	0	0	0	0	0	0	0	0	0	0	1	0	0	89	1	0	0	0	0	1	1	0	0	1	1	1	1	0	0	1
301	48	Male	Other type of exposure	Yes	38	0	1	1	1	0	1	1	0	1	1	0	0	0	0	0	0	0	0	0	0	0	1	0	0	0	0	0	97	0	0	0	0	0	0	0	0	0	0	0	0	0	0	0	0
302	52	Male	Health professional	NA	36	1	1	1	1	0	0	1	0	0	0	0	0	0	0	0	0	0	0	0	0	0	NA	NA	NA	NA	NA	NA	NA	0	0	0	0	0	0	0	0	0	0	0	0	0	0	0	0
303	47	Female	Health professional	No	36	NA	0	0	0	0	0	0	0	0	1	0	0	0	0	0	0	0	0	0	0	0	NA	NA	NA	NA	NA	NA	NA	1	0	0	0	0	0	0	0	0	0	0	0	0	0	0	0
304	61	Male	Other type of exposure	Yes	38.5	7	1	0	0	0	1	1	0	0	0	0	0	0	0	0	0	0	0	0	0	0	1	1	0	0	0	0	93	1	1	1	0	0	0	0	1	0	1	0	0	0	0	0	0
305	61	Male	Health professional	NA	38	5	1	1	0	1	0	0	0	0	0	0	0	0	0	0	0	0	0	0	0	0	NA	NA	NA	NA	NA	NA	98	0	0	0	0	0	0	0	0	0	0	0	0	0	0	0	0
306	82	Female	Other type of exposure	No	38.1	8	1	0	1	1	1	0	0	0	0	0	0	0	0	0	0	0	0	0	0	0	1	0	0	0	0	0	96	1	1	1	0	1	0	0	0	0	0	0	0	0	0	0	0
307	60	Female	Health professional	No	38.4	3	1	1	1	0	1	0	0	0	0	0	0	0	0	0	0	0	0	0	0	0	1	0	0	0	0	0	97	0	0	0	0	0	0	0	0	0	0	0	0	0	0	0	0
308	61	Male	Other type of exposure	Yes	38.5	4	1	1	1	1	0	0	1	0	0	0	0	0	0	0	0	0	0	0	0	0	1	0	0	0	0	0	95	1	1	0	0	0	0	1	1	1	0	0	0	0	0	0	0
309	28	Male	Health professional	NA	36	0	0	0	0	0	0	0	0	0	0	0	0	0	0	0	0	0	0	0	0	0	0	0	0	0	0	0	NA	0	0	0	0	0	0	0	0	0	0	0	0	0	0	0	0
310	45	Female	Other type of exposure	Yes	38.1	4	1	1	0	1	1	0	0	0	0	0	1	0	0	0	0	0	0	0	0	0	0	0	1	1	0	0	98	1	0	0	0	0	0	0	1	0	0	0	0	1	0	0	0
311	35	Male	Other type of exposure	No	37.5	4	1	1	1	0	1	1	1	1	1	0	0	0	0	0	0	0	0	0	0	0	1	0	0	0	0	0	97	1	0	0	0	0	0	0	0	0	0	0	0	0	0	0	0
312	75	Male	Other type of exposure	Yes	38.3	2	0	0	1	0	1	0	0	0	0	0	0	1	0	0	0	0	0	0	0	0	1	1	1	0	0	0	80	1	1	0	0	0	0	0	0	0	0	0	1	0	0	0	0
313	50	Female	Other type of exposure	Yes	38.8	5	1	1	1	1	0	1	0	0	0	0	0	1	0	0	0	0	0	0	0	0	0	0	0	1	0	0	98	1	0	0	0	0	0	0	0	0	0	0	1	0	0	0	0
314	50	Female	Health professional	Yes	37.5	0	0	0	1	0	0	0	0	0	0	0	0	0	0	0	0	0	0	0	0	0	NA	NA	NA	NA	NA	NA	NA	1	0	0	0	0	0	0	0	0	0	0	0	0	0	0	0
315	49	Male	Other health workers	Yes	36	0	0	0	0	0	0	0	0	1	1	0	1	0	0	0	0	0	0	0	0	0	NA	NA	NA	NA	NA	NA	NA	0	0	0	0	0	0	0	0	0	0	0	0	0	0	0	0
316	49	Male	Health professional	NA	37.2	0	1	1	0	0	0	0	0	0	0	1	0	0	0	0	0	0	0	0	0	0	1	0	0	0	0	0	95	0	0	0	0	0	0	0	0	0	0	0	0	0	0	0	0
317	61	Female	Health professional	No	36.5	0	1	1	0	0	1	0	1	0	0	0	0	0	0	0	0	1	0	0	0	0	0	0	0	1	0	0	98	1	0	0	0	0	0	0	0	1	0	0	0	0	0	1	0
318	48	Female	Health professional	No	36	2	1	0	0	0	0	0	0	1	0	0	0	0	1	0	0	0	0	0	0	0	NA	NA	NA	NA	NA	NA	NA	1	0	0	1	0	0	0	0	0	0	0	0	0	0	0	0
319	70	Female	Other type of exposure	No	37.5	5	1	1	1	0	1	0	0	0	0	0	1	0	0	0	0	1	0	0	0	0	1	0	0	0	0	0	90	1	0	0	1	0	0	0	0	0	0	0	0	0	0	0	0
320	48	Female	Health professional	NA	36	1	1	0	0	0	0	0	1	0	0	0	0	0	0	0	0	0	0	0	0	0	NA	NA	NA	NA	NA	NA	NA	1	0	0	0	0	1	0	0	0	0	0	0	0	0	0	0
321	63	Male	Health professional	No	36	1	1	0	0	0	0	0	0	0	0	0	0	0	0	0	0	0	0	0	0	0	NA	NA	NA	NA	NA	NA	NA	1	1	0	0	0	0	0	0	0	0	0	0	0	0	0	0
322	61	Male	Other type of exposure	No	39	4	1	0	0	0	1	0	0	0	0	1	0	0	0	0	0	0	0	0	0	0	1	0	0	0	0	0	94	1	1	0	0	0	0	0	0	0	0	0	0	0	0	0	0
[truncated: 71 more columns]
